# Supplementary material for: Embedding graphene nanoparticles into poly(N,N′-dimethylacrylamine) to prepare transparent nanocomposite films with high refractive index
Source: Royal Society of Chemistry journal article supplement (doi:10.1039/c2jm32871b), 2012-01-01
Supplement: c2jm32871b.pdf [file c2jm32871b.pdf]

## Electronic Supplementary Information

### **Embedding Graphene Nanoparticles into Poly (*N*, *N'*-dimethylacrylamine) to Prepare Transparent Nanocomposite Films with High Refractive Index**

Guoyan Zhang, Hao Zhang, Xiaoran Zhang, Shoujun Zhu, Liang Zhang, Qingnan Meng, Mingyang Wang, Yunfeng Li and Bai Yang\*

State Key Laboratory of Supramolecular Structure and Materials, College of Chemistry,

Jilin University, Changchun 130012, P. R. China. E-mail: byangchem@jlu.edu.cn

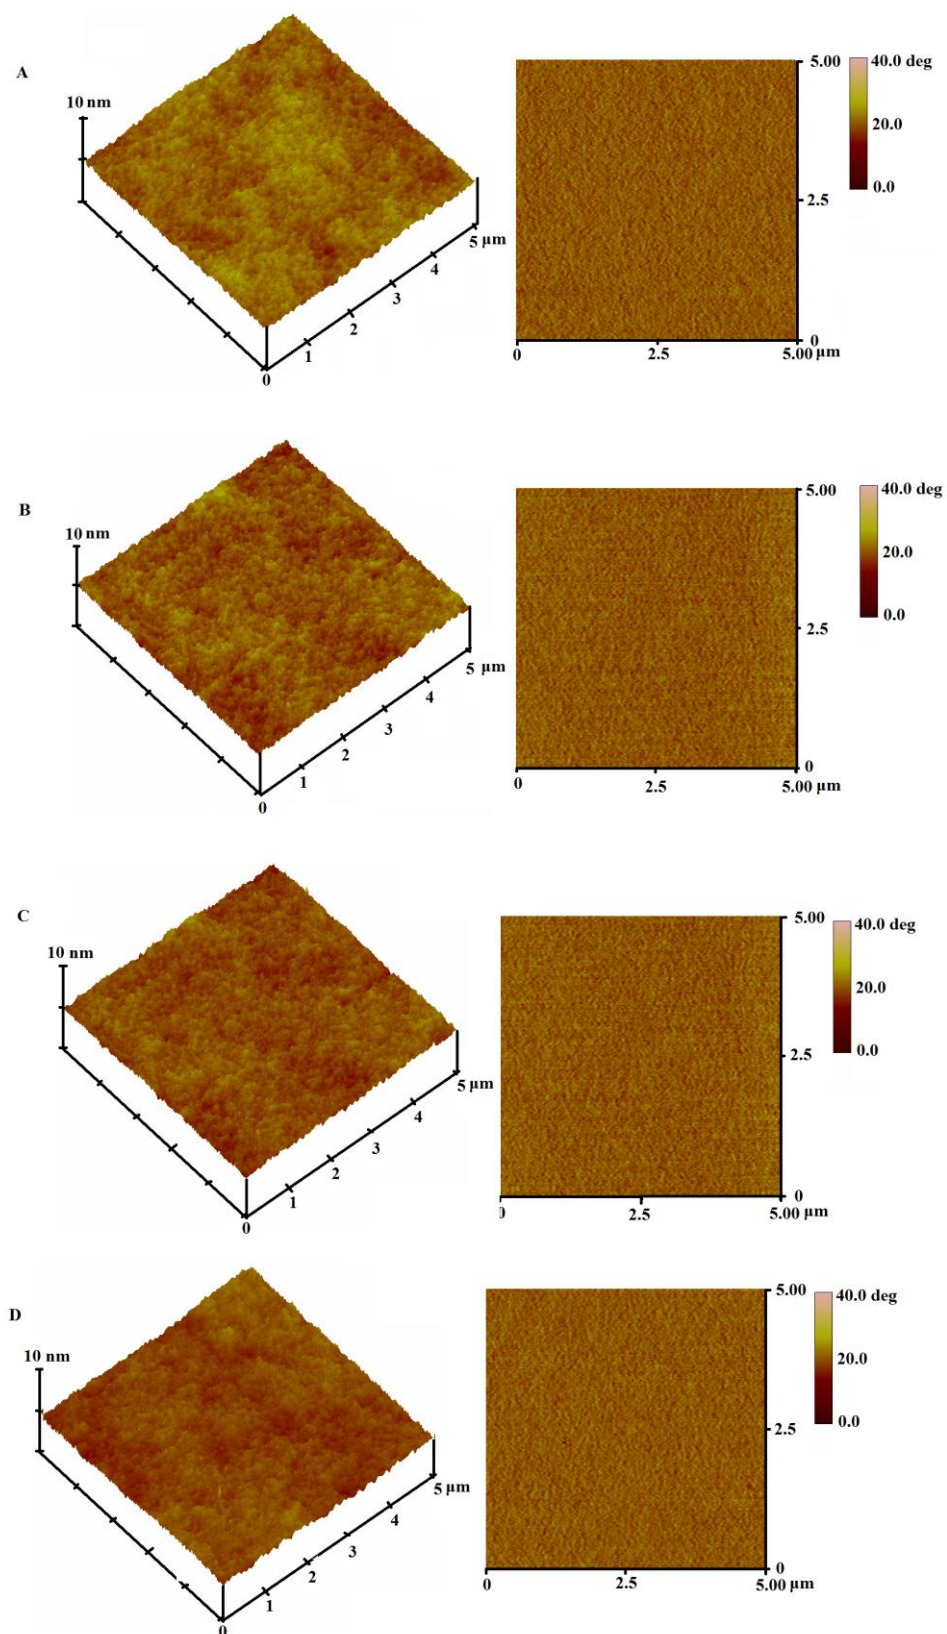

**Fig. S1** AFM images of pristine PDMAA (A) and GNPs-PDMAA with 10 wt% (B), 30 wt% (C), 50 wt% (D) contents of GNPs. (Left) height, (right) phase.

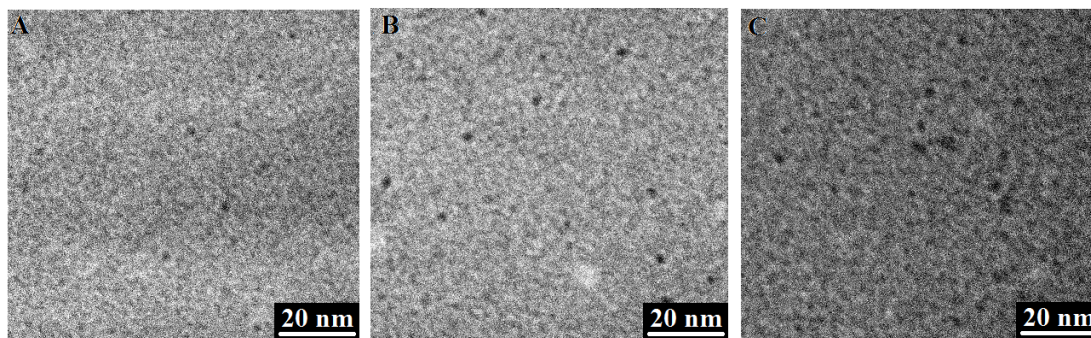

**Fig. S2** TEM images of the nanocomposite films of GNPs-P(DMAA-St) with 10 wt% (A), 30 wt% (B), 50 wt% (C) contents of GNPs.

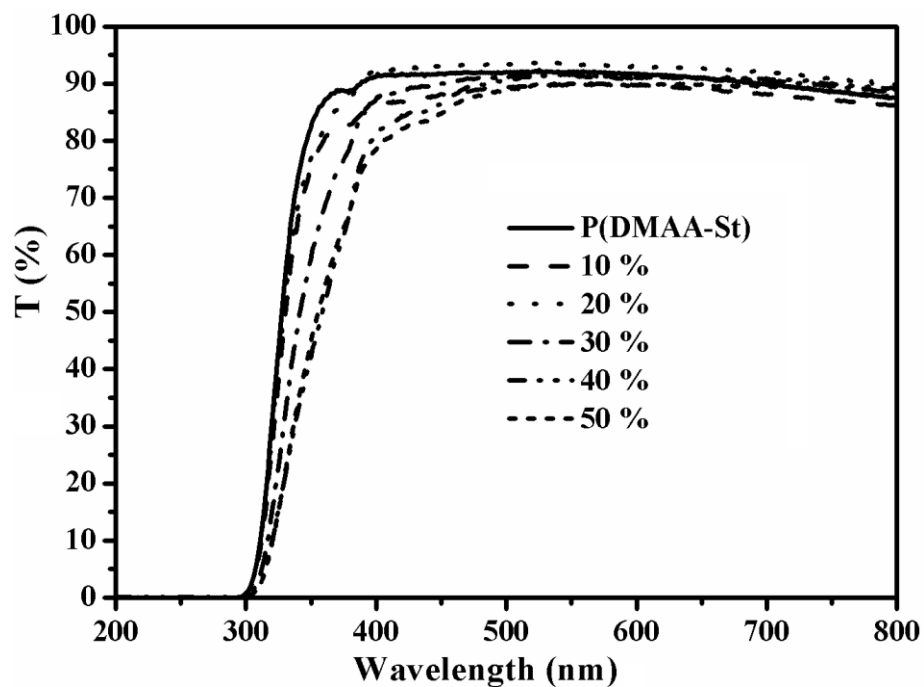

**Fig. S3** UV-vis transmittance spectra of GNPs-P(DMAA-St) with different content of GNPs.
